# Supplementary material for: Diagnosing the Dynamics of Observed and Simulated Ecosystem Gross Primary Productivity with Time Causal Information Theory Quantifiers
Source: PLoS One. 2016 Oct 20;11(10):e0164960. doi: 10.1371/journal.pone.0164960 (PMC5072746; doi:10.1371/journal.pone.0164960)
Supplement: S1 Code — (R) [file pone.0164960.s010.R]

# ------------------------------------------------------------
# "statcomp" - An R package for statistical complexity analysis
# ------------------------------------------------------------

# Sebastian Sippel
# 26.08.2016


# 1. Installation & Manual
# ---------------------------------------------------
# To facilitate a wider application of statistical complexity measures, 
# an open-source R-package has been created and the links to more detailed information are given below. 
# The package source code and introduction is available from \url{http://statcomp.r-forge.r-project.org}. 
# A PDF manual that includes a thorough description of all relevant functionality can be found at
# https://r-forge.r-project.org/scm/viewvc.php/*checkout*/pkg/statcomp.pdf?root=statcomp. 
# A short tutorial to reproduce Fig. 1 and Fig. 2 in the main paper is provided here.

# To install the R-package on Mac/Linux:
# 1. open an R console
# 2. type install.packages("statcomp", repos="http://R-Forge.R-project.org", type="source")

# To install the R-package on Windows:
# 1. Download and save precompiled \textit{statcomp.zip} file from \url{https://r-forge.r-project.org/R/?group_id=2080}
# 2. open an R console
# 3. type install.packages(pkgs = "C:/YOUR-DIR/statcomp.zip", repos = NULL)


# 2. Tutorial: "statcomp" & Reproduction of Figs. 1 and 2 in Sippel et al., 2016, PLOS ONE.
# ---------------------------------------------------
library(statcomp)
library(fNonlinear)
library(fArma)


# i. Define local function to get complexity
# rank_transform: 
# if rank_transform=T, lehmer-permutation scheme is used (i.e. following Olivares et al. 2012, Physica A 391 (2012) 2518-2526)
# if rank_transform=T, keller-permutation scheme is used (see e.g. Olivares et al. 2012, Physica A 391 (2012) 2518-2526)
# the transformation of ranks is OPTIONAL, but is included here
get.complexity <- function(x, ndemb = 6, rank_transform = T) {
    
  if (rank_transform == T) {
    # get ranks matrix of the "lehmerperm"-matrix in Olivares' paper:
    transform_lehmer = transformPermCoding(target_pattern=t(apply(X=generate_lehmerperm_matrix(ndemb=6), MARGIN=1, FUN=rank_to_permutation)), ndemb=6)
    opd = ordinal_pattern_distribution(x=x, ndemb = ndemb)[transform_lehmer]
    wpe = weighted_ordinal_pattern_distribution(x=x, ndemb = ndemb)[transform_lehmer]
  } else {
    opd = ordinal_pattern_distribution(x=x, ndemb = ndemb)
    wpe = weighted_ordinal_pattern_distribution(x=x, ndemb = ndemb)
  }
    
  return(c(permutation_entropy(opd), MPR_complexity(opd), fis(opd),
           permutation_entropy(wpe), MPR_complexity(wpe), fis(wpe)))
}


# ---------------------------------------
# I. Calculate simple chaotic maps and noise processes:
# ----------------------------------------
# Parameter vectors for chaotic maps:
logistic.par = seq(3, 4, 0.1)
quadratic.par = seq(1.4, 2, 0.1)
schuster.par = c(5/2,2,3/2)
skew_tent.par = 0.1847

# noise processes:
knoise.par = seq(0,5, 0.5)
fbm.par = seq(0.1, 0.9, 0.2)
fgn.par = seq(0.1, 0.9, 0.2)


# 1. Logistic map
# ------------------------------------------
# https://en.wikipedia.org/wiki/Logistic_map
# http://www.sciencedirect.com/science/article/pii/0167278983902981
logistic.complexity = sapply(X=logistic.par, FUN=function(par) get.complexity(x= logistic_map(N=10^5, r=par, disregard_N=10^5), ndemb=6))


# 2. Quadratic map:
# ------------------------------------------
# http://www.sciencedirect.com/science/article/pii/0167278983901264
quadratic.complexity = sapply(X= quadratic.par, FUN=function(par) get.complexity(quadratic_map(N= 10^4, k=par)))

# 3. Schuster map:
schuster.complexity = sapply(X=schuster.par, FUN=function(par) get.complexity(schuster_map(N= 10^4, z=par, disregard_N=10^3)))

#
# ------------------------------------------
# 4. Skew Tent
skew_tent.complexity <- sapply(X=skew_tent.par, FUN=function(par) get.complexity(x=skew_tent_map(N=10^4, a=par, disregard_N=10^3), ndemb = 6))
# a=0.1847


# ------------------------------------------
# 5. Henon Map
henon_ts = henon_map(N=10^4, disregard_N=1000)
henon.complexity.x <- get.complexity(x=henon_ts$x_ts, ndemb = 6)
henon.complexity.y <- get.complexity(x=henon_ts$y_ts, ndemb = 6)


# ------------------------------------------
# II. Noise processes:
# ------------------------------------------

# 1. knoise
# -------------------------
knoise.complexity = sapply(X= knoise.par, FUN=function(par) get.complexity(x=powernoise(k=par, N=10^4)[[1]], ndemb=6))
  

# 2. fbm
# ----------------------
fbm.complexity = sapply(X= fbm.par, FUN=function(par) get.complexity(x=fbmSim(n = 10^4, H = par, method = "circ", fgn=F, doplot=F), ndemb = 6))

# 3. fgn
# ----------------------
# fgnSim(n = 10^4, H=par, method="circ")
fgn.complexity = sapply(X= fgn.par, FUN=function(par) get.complexity(x=fbmSim(n = 10^4, H=par, method="circ", fgn=T, doplot=F), ndemb = 6))


# ------------------------------------------
# III. "Trivial processes"
# ------------------------------------------
const.complexity = get.complexity(x=1:10^4, ndemb = 6)
updown.complexity = get.complexity(x=rep(c(-1, 1), 10^4/2), ndemb = 6)
sine.complexity = get.complexity(x=sin(rep(seq(0, 2*pi, length.out = 365), 10^4/12)), ndemb = 6)


# --------------------------------------------
# IV. Plot time causal information planes
# --------------------------------------------

# Fig. 1. Shannon - MPR complexity:
# -------------------------------
plot(c(1,1), type='n', bty='n', ylim=c(0,0.6), xlim=c(0,1),
     xlab="Normalized Shannon Entropy", ylab = "MPR complexity")
lines(x=mind6[,1], y=mind6[,2])
lines(x=maxd6[,1], y=maxd6[,2])

# 1. plot noise signals:
points(x=knoise.complexity[1,], y=knoise.complexity[2,], col="darkblue", pch = 16)
lines(x=knoise.complexity[1,], y=knoise.complexity[2,], col="darkblue", lty = 3)

# 2. plot complexity signals:
points(x= logistic.complexity[1,], y=logistic.complexity[2,], pch=3)
lines(x = logistic.complexity[1,], y=logistic.complexity[2,], lty=3)

points(x = quadratic.complexity[1,], y= quadratic.complexity[2,], pch = 8)
lines(x = quadratic.complexity[1,], y= quadratic.complexity[2,], lty = 3)

points(x= schuster.complexity[1,], y=schuster.complexity[2,], pch=4)
lines(x= schuster.complexity[1,], y=schuster.complexity[2,], lty=3)

points(skew_tent.complexity[1], skew_tent.complexity[2], pch=2)

# 3. trivial processes:
points(x= const.complexity[1], y=const.complexity[2], pch = 15, col="darkgreen")
points(x= updown.complexity[1], y= updown.complexity[2], pch = 15, col="darkgreen")
points(x= sine.complexity[1], y= sine.complexity[2], pch = 15, col="darkgreen")

legend("topleft", c("Logistic Map", "Quadratic Map", "Schuster Map", "Skew Tent Map", "k-noise"), 
       pch = c(3, 8, 4, 2, 16), bty='n', col=c(rep("black", 4), "darkblue"))


# Fig. 2. Shannon - Fisher Information:
# -------------------------------
plot(c(1,1), type='n', bty='n', ylim=c(0,1), xlim=c(0,1),
     xlab="Normalized Shannon Entropy", ylab = "Normalized Fisher Information")

# 1. plot noise signals:
points(x=knoise.complexity[1,], y=knoise.complexity[3,], col="darkblue", pch = 16)
lines(x=knoise.complexity[1,], y=knoise.complexity[3,], col="darkblue", lty = 3)

# 2. plot complexity signals:
points(x= logistic.complexity[1,], y=logistic.complexity[3,], pch=3)
lines(x = logistic.complexity[1,], y=logistic.complexity[3,], lty=3)

points(x = quadratic.complexity[1,], y= quadratic.complexity[3,], pch = 8)
lines(x = quadratic.complexity[1,], y= quadratic.complexity[3,], lty = 3)

points(x= schuster.complexity[1,], y=schuster.complexity[3,], pch=4)
lines(x= schuster.complexity[1,], y=schuster.complexity[3,], lty=3)

points(skew_tent.complexity[1], skew_tent.complexity[3], pch=2)

# 3. trivial processes:
points(x= const.complexity[1], y=const.complexity[3], pch = 15, col="darkgreen")
points(x= updown.complexity[1], y= updown.complexity[3], pch = 15, col="darkgreen")
points(x= sine.complexity[1], y= sine.complexity[3], pch = 15, col="darkgreen")

legend("bottomleft", c("Logistic Map", "Quadratic Map", "Schuster Map", "Skew Tent Map", "k-noise"), 
       pch = c(3, 8, 4, 2, 16), bty='n', col=c(rep("black", 4), "darkblue"))
